# Supplementary material
Source: PubMed Central journal article supplement (PMC3607017)
Supplement: 1301996110_pnas.201301996SI.pdf [file 1301996110_pnas.201301996SI.pdf]

# Supporting Information

Kotas et al. 10.1073/pnas.1301996110

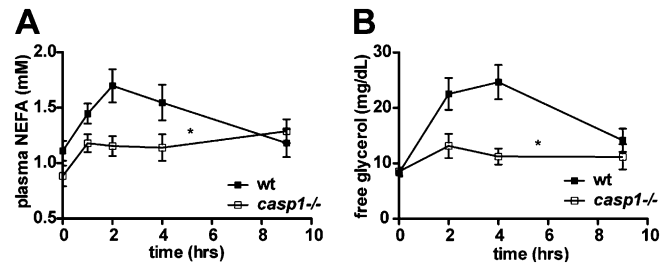

Fig. S1. Glycerol and nonesterified fatty acid (NEFA) parallel triglyceride (TG) during an oral fat tolerance test, demonstrating that TG hydrolysis and clearance are paired. (A) Glycerol ( $n = 7-8$  per group) and (B) NEFA ( $n = 9-10$  per group) after an oral lipid load. \* $P < 0.05$  by ANOVA. Error bars represent SEM.

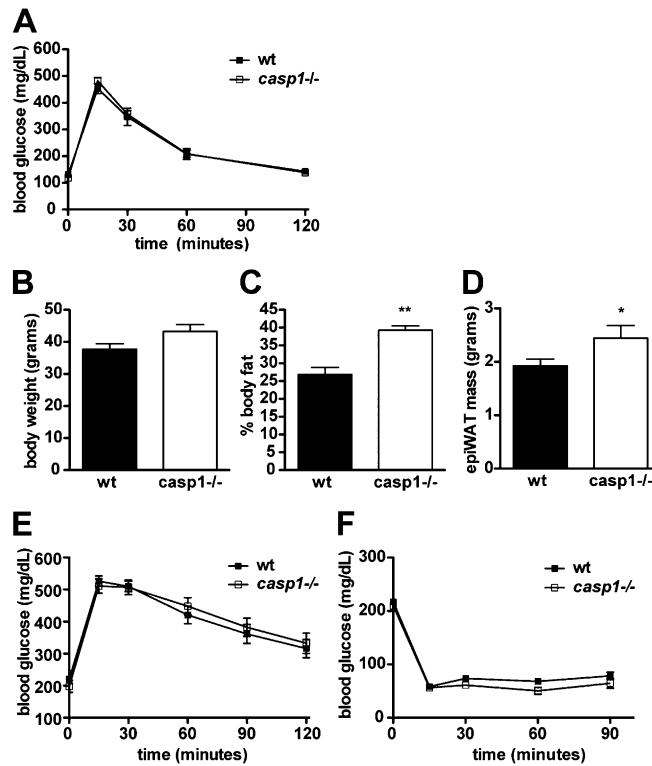

Fig. S2. Reduced plasma lipid does not confer protection against diet-induced obesity or insulin resistance. (A) Glucose tolerance test in chow-fed mice. (B) Body weight ( $P = 0.06$ ), (C) percentage body fat, and (D) bilateral epididymal fat pad weight of 12-wk high-fat diet (HFD)-fed mice. (E) Glucose tolerance test, and (F) insulin tolerance test in HFD-fed mice. \* $P < 0.05$ , \*\* $P < 0.001$ ;  $n = 7-10$  per group. Error bars represent SEM.

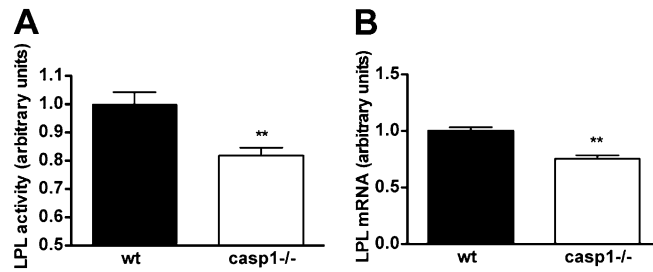

**Fig. 53.** Lipoprotein lipase (LPL) expression and activity are lower in brown adipose tissue (BAT) of *casp1<sup>-/-</sup>* mice. (A) Relative LPL activity measured from equal masses of homogenized intrascapular BAT. (B) Relative LPL mRNA expression in intrascapular BAT. \*\* $P < 0.005$ ;  $n = 6-8$  per group. Error bars represent SEM.

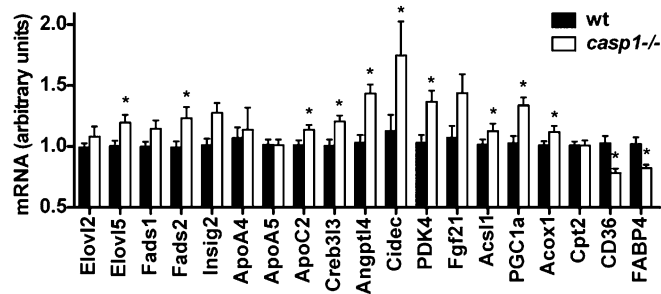

**Fig. 54.** Gene expression in WT and *casp1<sup>-/-</sup>* livers. \* $P < 0.05$ ;  $n = 14-16$  per group. Error bars represent SEM.

**Table S1. Indirect calorimetry shows similar whole-body metabolism in *casp1<sup>-/-</sup>* and WT mice**

| Parameter               | Light cycle   |                            |                | Dark cycle     |                            |                |
|-------------------------|---------------|----------------------------|----------------|----------------|----------------------------|----------------|
|                         | WT            | <i>casp1<sup>-/-</sup></i> | <i>P</i> value | WT             | <i>casp1<sup>-/-</sup></i> | <i>P</i> value |
| Regular chow diet       |               |                            |                |                |                            |                |
| n                       | 6             | 7                          |                | 6              | 7                          |                |
| VO <sub>2</sub> (mL/h)  | 148.96 ± 8.84 | 149.67 ± 4.74              | 0.94           | 170.10 ± 10.52 | 177.14 ± 5.36              | 0.55           |
| VCO <sub>2</sub> (mL/h) | 130.98 ± 7.30 | 133.92 ± 3.89              | 0.72           | 167.14 ± 8.96  | 174.75 ± 5.30              | 0.46           |
| RER                     | 0.88 ± 0.01   | 0.89 ± 0.01                | 0.28           | 0.98 ± 0.01    | 0.99 ± 0.01                | 0.77           |
| Heat (kcal/h)           | 0.73 ± 0.04   | 0.74 ± 0.02                | 0.88           | 0.86 ± 0.05    | 0.89 ± 0.03                | 0.52           |
| Activity (counts/h)     | 89.23 ± 9.41  | 94.59 ± 22.87              | 0.84           | 270.90 ± 51.29 | 370.44 ± 75.29             | 0.32           |
| Food intake (g/h)       | 0.10 ± 0.01   | 0.11 ± 0.01                | 0.53           | 0.24 ± 0.03    | 0.25 ± 0.03                | 0.78           |
| High-fat diet           |               |                            |                |                |                            |                |
| n                       | 10            | 7                          |                | 10             | 7                          |                |
| VO <sub>2</sub> (mL/h)  | 99.73 ± 3.58  | 103.31 ± 1.59              | 0.44           | 113.61 ± 3.38  | 117.08 ± 1.86              | 0.44           |
| VCO <sub>2</sub> (mL/h) | 79.50 ± 2.57  | 82.04 ± 1.05               | 0.44           | 90.75 ± 2.33   | 92.22 ± 1.44               | 0.64           |
| RER                     | 0.80 ± 0.00   | 0.79 ± 0.01                | 0.68           | 0.80 ± 0.00    | 0.79 ± 0.01                | 0.18           |
| Heat (kcal/h)           | 0.48 ± 0.02   | 0.50 ± 0.01                | 0.44           | 0.54 ± 0.02    | 0.56 ± 0.01                | 0.44           |
| Activity (counts/h)     | 53.82 ± 10.41 | 54.01 ± 13.14              | 0.99           | 135.74 ± 21.28 | 144.18 ± 28.57             | 0.81           |
| Food intake (g/h)       | 0.06 ± 0.01   | 0.06 ± 0.01                | 0.74           | 0.11 ± 0.01    | 0.09 ± 0.01                | 0.40           |

RER, respiratory exchange ratio; VCO<sub>2</sub>, CO<sub>2</sub> production rate; VO<sub>2</sub>, oxygen consumption rate.

**Table S2. List of genes examined by quantitative RT-PCR**

| Symbol         | Gene name                                                               |
|----------------|-------------------------------------------------------------------------|
| <i>Acox1</i>   | Acyl-CoA oxidase 1, palmitoyl                                           |
| <i>Acs11</i>   | Acyl-CoA synthetase long-chain family member 1                          |
| <i>Angptl4</i> | Fasting-induced adipose factor; angiopoietin-like 4                     |
| <i>ApoA4</i>   | Apolipoprotein A4                                                       |
| <i>ApoA5</i>   | Apolipoprotein A5                                                       |
| <i>ApoC1</i>   | Apolipoprotein C1                                                       |
| <i>ApoC2</i>   | Apolipoprotein C2                                                       |
| <i>CD36</i>    | Fatty acid translocase                                                  |
| <i>Cidec</i>   | Cell death-inducing DFFA-like effector c                                |
| <i>Cpt2</i>    | Carnitine palmitoyltransferase 2                                        |
| <i>Creb3l3</i> | cAMP responsive element binding protein 3-like 3; CREB-H                |
| <i>Elovl2</i>  | Elongation of very long-chain fatty acids 2                             |
| <i>Elovl5</i>  | Elongation of very long-chain fatty acids 5                             |
| <i>FABP4</i>   | Fatty acid binding protein 4                                            |
| <i>Fads1</i>   | Fatty acid desaturase 1                                                 |
| <i>Fads2</i>   | Fatty acid desaturase 2                                                 |
| <i>Fgf21</i>   | Fibroblast growth factor 21                                             |
| <i>Insig2</i>  | Insulin-induced gene 2                                                  |
| <i>Nlrp3</i>   | NLR family, pyrin domain containing 3                                   |
| <i>PDK4</i>    | Pyruvate dehydrogenase kinase, isozyme 4                                |
| <i>PGC1a</i>   | Peroxisome proliferator-activated receptor gamma coactivator-1 $\alpha$ |
| <i>Pycard</i>  | PYD and CARD domain containing                                          |

CARD, caspase recruitment domain; CREB, cAMP responsive element binding protein; DFFA, DNA fragmentation factor; PYD, pyrin domain.
